# Supplementary material
Source: PubMed Central journal article supplement (PMC2820278)
Supplement: NIHMS171390-supplement-1_si_001.pdf [file NIHMS171390-supplement-1_si_001.pdf]

*Supporting Information for:*

NMR, IR/Raman, and Structural Properties in HNO and RNO ( R = alkyl and aryl) Metalloporphyrins with Implication for the HNO-myoglobin Complex

By

Yan Ling, Christopher Mills, Rebecca Weber, Liu Yang, and Yong Zhang\*

Department of Chemistry and Biochemistry, University of Southern Mississippi,  
118 College Drive #5043, Hattiesburg, MS 39406

Full Citation of Gaussian 03 in Ref.69:

Frisch, M. J.; Trucks, G. W.; Schlegel, H. B.; Scuseria, G. E.; Robb, M. A.; Cheeseman, J. R.; Montgomery, Jr., J. A.; Vreven, T.; Kudin, K. N.; Burant, J. C.; Millam, J. M.; Iyengar, S. S.; Tomasi, J.; Barone, V.; Mennucci, B.; Cossi, M.; Scalmani, G.; Rega, N.; Petersson, G. A.; Nakatsuji, H.; Hada, M.; Ehara, M.; Toyota, K.; Fukuda, R.; Hasegawa, J.; Ishida, M.; Nakajima, T.; Honda, Y.; Kitao, O.; Nakai, H.; Klene, M.; Li, X.; Knox, J. E.; Hratchian, H. P.; Cross, J. B.; Bakken, V.; Adamo, C.; Jaramillo, J.; Gomperts, R.; Stratmann, R. E.; Yazyev, O.; Austin, A. J.; Cammi, R.; Pomelli, C.; Ochterski, J. W.; Ayala, P. Y.; Morokuma, K.; Voth, G. A.; Salvador, P.; Dannenberg, J. J.; Zakrzewski, V. G.; Dapprich, S.; Daniels, A. D.; Strain, M. C.; Farkas, O.; Malick, D. K.; Rabuck, A. D.; Raghavachari, K.; Foresman, J. B.; Ortiz, J. V.; Cui, Q.; Baboul, A. G.; Clifford, S.; Cioslowski, J.; Stefanov, B. B.; Liu, G.; Liashenko, A.; Piskorz, P.; Komaromi, I.; Martin, R. L.; Fox, D. J.; Keith, T.; Al-Laham, M. A.; Peng, C. Y.; Nanayakkara, A.; Challacombe, M.; Gill, P. M. W.; Johnson, B.; Chen, W.; Wong, M. W.; Gonzalez, C.; Pople, J. A.; Gaussian 03, Revision D.01; Gaussian, Inc.: Wallingford CT, 2004.

Computational details: (reference numbers are the same as cited in the Text).

We first investigated HNO to see for this small molecule how well we can improve over the previous predictions of the geometric structures and vibrational frequencies,<sup>37</sup> which will build a basis for subsequent calculations for synthetic HNO metal complexes. Compared to the experimental results,<sup>80, 81</sup> although the NO and NH bond lengths from using the hybrid DFT method B3LYP with a 6-311G(2d,2p) basis in the previous work are acceptable,<sup>37</sup> the predicted NO and HNO vibrational frequencies are of too large errors: 90 and 73 cm<sup>-1</sup>, respectively. We evaluated the B3LYP calculations with some other basis sets and found that using the larger basis set in particular the diffuse functions can improve the frequency results, see Table S1. However, this improvement is insignificant, in contrast to the use of the pure DFT

method BLYP, which can have errors close to  $10\text{ cm}^{-1}$  even with the 6-311G(2d,2p) basis,<sup>37</sup> Table 1. We then used another hybrid method mPW1PW91 which contains more HF exchange component compared to B3LYP to examine the effect of HF exchange on such kind of calculations. As shown in Table S1, results are even worse, e.g. the errors in  $\nu_{\text{NO}}$  predictions are  $143\text{-}170\text{ cm}^{-1}$ . These results suggest that the methods with less or no HF exchange may perform better in the investigation of HNO vibrations.

Indeed, with pure DFT methods, some better predictions of  $\nu_{\text{NO}}$  and  $\nu_{\text{HNO}}$  were achieved with errors of  $2\text{-}8\text{ cm}^{-1}$  (see Table S1), even using the 6-311G(2d,2p) basis. Among all 74 different methods used in this work (see Table S1 for details), a new pure DFT method mPWVWN with a 6-311++G(2d,2p) basis produces the best predictions with only 1 and  $0\text{ cm}^{-1}$  errors for  $\nu_{\text{NO}}$  and  $\nu_{\text{HNO}}$ , and  $0.006\text{ \AA}$  deviations for both NO and NH bond lengths.

Based on above calculations, the mPWVWN method was then used in geometry optimizations and frequency calculations of all HNO, RNO, and NO heme model complexes investigated here (**2-7**, **9-13**), with the 6-311++G(2d,2p) basis for HNO and the first coordination shell atoms, while the rest atoms were treated with a 6-31G(d) basis for computational efficiency. For calculations of the proton NMR chemical shifts,  $\delta_{\text{H}}$ , in the HNO moieties of the HNO metal complexes, we used the method that previously yielded excellent predictions of  $^1\text{H}$  NMR shifts in various metal-containing systems,<sup>82</sup> i.e., the B3LYP functional with a 6-311++G(2d,2p) basis for HNO and the first coordination shell atoms and a 6-31G(d) basis for the rest atoms.

We first investigated the only HNO heme model complex reported to date, Ru(TTP)(HNO)(1-MeIm) (**2**). As shown in Table S2, the use of different metal bases (SDD, CEP-121G, DGDZVP) can result in  $15\text{ cm}^{-1}$  and  $1.06\text{ ppm}$  differences in the predicted  $\nu_{\text{NO}}$  and  $\delta_{\text{H}}$  values, respectively. By using the all electron basis DGDZVP for Ru, the deviations from experimental  $\nu_{\text{NO}}$  and  $\delta_{\text{H}}$  data<sup>33</sup> are only  $2\text{ cm}^{-1}$  and  $0.46\text{ ppm}$ . To further examine this method, we then performed calculations of Ru(HNO)(‘py<sup>bu</sup>S<sub>4</sub>’) (**3**), which compared to other known HNO metal complexes characterized by IR and NMR techniques<sup>24-29, 31, 32</sup> is closest to a heme model environment by having a relatively rigid ligand set in the equatorial plane and a nitrogen-coordinated ligand in the axial position. As shown in Table 2, the predicted values of  $1370\text{ cm}^{-1}$  and  $19.98\text{ ppm}$  are in good agreement with experimental results of  $1358\text{ cm}^{-1}$  and  $19.56\text{ ppm}$ .<sup>30</sup> The gas phase  $\nu_{\text{NO}}$  prediction error ( $12\text{ cm}^{-1}$ ) here is much smaller compared to the error of  $155\text{ cm}^{-1}$  in the previous work.<sup>30</sup> Therefore, the all electron basis DGDZVP was chosen for Ru.

Based on above calculations, we used an all electron basis – Wachters’ basis for iron in the geometry optimizations and frequencies calculations for HNO and RNO iron porphyrin complexes. The use of Wachters’ basis for iron previously enabled excellent predictions of several spectroscopic properties in heme proteins and models.<sup>42, 44-46, 52</sup> As seen from Figure 1, the basic difference between the two RNO heme model molecules **4** and **5** is the orientation of the 1-MeIm ligand, while the  $^i\text{PrNO}$  ligand orientations are essentially the same. These experimental structural features<sup>35</sup> were retained in the optimized structures. Moreover, the optimized key geometric parameters (NO bond length,  $R_{\text{NO}}$ ; metal-NO bond length,  $R_{\text{MN}}$ ; metal-NO bond angle,  $\angle\text{M-N-O}$ ) are also in good accord with experimental observations, see Table 2. For example, the average error in NO bond length is  $0.01\text{ \AA}$  and that for Fe-N-O angle is  $0.5^\circ$ . Consequently, the errors in the predicted  $\nu_{\text{NO}}$  values are only  $-5$  and  $6\text{ cm}^{-1}$  for **4** and **5**, respectively. Additional

calculations of these HNO, RNO, and NO heme models using the next two favorable methods (BVWN5/6-311G(2d,2p) and mPWVWN5/6-311G(2d,2p), which produced errors of 2 and 3  $\text{cm}^{-1}$  for  $\nu_{\text{NO}}$  predictions for HNO respectively) were also carried out. As shown in Table S3, their mean absolute errors of  $\nu_{\text{NO}}$  predictions are 12.8  $\text{cm}^{-1}$ , which is ca. 70% larger than that from using the mPWVWN method described above, 7.6  $\text{cm}^{-1}$ . These results further support the use of the new pure DFT method mPWVWN in predictions of NO vibrations in HNO, RNO, and NO heme systems.

We then moved to the predictions of  $^{15}\text{N}$  NMR chemical shifts in RNO heme model complexes, which also have experimental results to compare.<sup>34</sup> As the experimental data are referenced to  $\text{NH}_3$ , we first evaluated the calculations for  $\text{NH}_3$  (**8**) itself. Using the experimental  $^{15}\text{N}$  NMR absolute chemical shielding of 264.54 ppm,<sup>86</sup> the predicted  $^{15}\text{N}$  chemical shifts from using a good variety of DFT methods are listed in Table S4. Results clearly indicate that both the exchange and correlation functionals can influence the predictions. Among the fourteen DFT methods examined here, the OP86/6-311++G(2d,2p) calculation generated the best result, with an error of 0.74 ppm. This method was then used to investigate the  $^{15}\text{N}$  NMR properties in several RNO iron porphyrins **9-12**. Again, the first coordination shell atoms plus the NO and the atom directly bonded with NO were treated with the 6-311++G(2d,2p) basis and the rest atoms were calculated with a 6-31G(d) basis except for iron. This is designated as 6-311++G(2d,2p)|metal's basis|6-31G(d) in this work. Calculations using the OP86 method as well as a couple of other DFT methods were performed together with the examination of several types of metal basis functions on complex **9**. As seen from Table S4, the OP86 method again gives the best prediction, with an error of 11 ppm using the LanL2DZ basis: 605 ppm (expt) vs. 616 ppm (calc). Such a computational error is close to that seen in solution  $^{15}\text{N}$  NMR for investigating protein systems due to a number of experimental effects.<sup>87</sup> An error of 11 ppm for **9** is much improved over the previously reported error of 23 ppm.<sup>34</sup> An overall comparison of the calculated  $^{15}\text{N}$  NMR shifts with experiment for **8-12** shows an  $R^2 = 0.996$  and SD of 19 ppm for RNO iron porphyrin complexes, or 3.1% of the studied experimental shift range. In addition, the predicted  $^{15}\text{N}$  NMR chemical shift tensor elements (Table S5) are also in excellent agreement with experimental data, with an  $R^2 = 0.991$  and 3.5% error over the entire experimental range of 1281 ppm.

Based on these calculations for HNO and RNO heme model complexes as well as additional results in Table S6, we used the following methods for  $\nu_{\text{NO}}$ ,  $\delta_{\text{H}}$ , and  $\delta_{\text{N}}$  predictions in MbHNO models (**13-16**): mPWVWN/6-311++G(2d,2p)|Wachters|6-31G(d), B3LYP/6-311++G(2d,2p)|LanL2DZ|6-31G(d), and OP86/6-311++G(2d,2p)|LanL2DZ|6-31G(d), respectively.

**Table S1.** Errors in Geometry Optimizations and Frequency Calculations for HNO

| Entry | DFT method | Basis           | $\Delta R_{\text{NO}}$<br>(Å) | $\Delta R_{\text{NH}}$<br>(Å) | $\Delta \nu_{\text{NO}}$<br>( $\text{cm}^{-1}$ ) | $\Delta \nu_{\text{HNO}}$<br>( $\text{cm}^{-1}$ ) |
|-------|------------|-----------------|-------------------------------|-------------------------------|--------------------------------------------------|---------------------------------------------------|
| 1     | B3LYP      | 6-311G(d)       | -0.011                        | 0.002                         | 110                                              | 106                                               |
| 2     |            | 6-311G(d,p)     | -0.011                        | 0.003                         | 107                                              | 76                                                |
| 3     |            | 6-311G(2d,2p)   | -0.010                        | -0.002                        | 91                                               | 75                                                |
| 4     |            | 6-311+G(d)      | -0.012                        | 0.000                         | 108                                              | 96                                                |
| 5     |            | 6-311+G(d,p)    | -0.011                        | 0.001                         | 105                                              | 65                                                |
| 6     |            | 6-311+G(2d,2p)  | -0.010                        | -0.003                        | 88                                               | 67                                                |
| 7     |            | 6-311++G(d)     | -0.012                        | 0.001                         | 108                                              | 96                                                |
| 8     |            | 6-311++G(d,p)   | -0.011                        | 0.002                         | 105                                              | 65                                                |
| 9     |            | 6-311++G(2d,2p) | -0.010                        | -0.003                        | 88                                               | 65                                                |
| 10    | mPW1PW91   | 6-311G(d)       | -0.019                        | -0.002                        | 170                                              | 128                                               |
| 11    |            | 6-311G(d,p)     | -0.019                        | -0.001                        | 168                                              | 94                                                |
| 12    |            | 6-311G(2d,2p)   | -0.017                        | -0.005                        | 146                                              | 93                                                |
| 13    |            | 6-311+G(d)      | -0.020                        | -0.004                        | 169                                              | 118                                               |
| 14    |            | 6-311+G(d,p)    | -0.019                        | -0.002                        | 166                                              | 83                                                |
| 15    |            | 6-311+G(2d,2p)  | -0.018                        | -0.006                        | 143                                              | 85                                                |
| 16    |            | 6-311++G(d)     | -0.020                        | -0.003                        | 168                                              | 117                                               |
| 17    |            | 6-311++G(d,p)   | -0.019                        | -0.002                        | 166                                              | 83                                                |
| 18    |            | 6-311++G(2d,2p) | -0.018                        | -0.006                        | 143                                              | 84                                                |
| 19    | BPW91      | 6-311G(d)       | -0.001                        | 0.021                         | 41                                               | 49                                                |
| 20    |            | 6-311G(d,p)     | -0.001                        | 0.021                         | 35                                               | 21                                                |
| 21    |            | 6-311G(d,2p)    | 0.000                         | 0.017                         | 36                                               | 18                                                |
| 22    |            | 6-311G(d,3p)    | 0.000                         | 0.017                         | 38                                               | 18                                                |
| 23    |            | 6-311G(d,3pd)   | 0.000                         | 0.017                         | 36                                               | 14                                                |
| 24    |            | 6-311G(2d)      | 0.000                         | 0.020                         | 30                                               | 25                                                |
| 25    |            | 6-311G(2d,p)    | 0.001                         | 0.019                         | 23                                               | 16                                                |
| 26    |            | 6-311G(2d,2p)   | 0.001                         | 0.025                         | 24                                               | 13                                                |
| 27    |            | 6-311G(2d,3p)   | 0.001                         | 0.017                         | 26                                               | 8                                                 |
| 28    |            | 6-311G(2d,3pd)  | 0.001                         | 0.016                         | 25                                               | 8                                                 |
| 29    |            | 6-311G(3d)      | -0.001                        | 0.018                         | 40                                               | 30                                                |
| 30    |            | 6-311G(3d,p)    | -0.001                        | 0.019                         | 34                                               | 19                                                |
| 31    |            | 6-311G(3d,2p)   | -0.001                        | 0.017                         | 35                                               | 18                                                |
| 32    |            | 6-311G(3d,3p)   | -0.001                        | 0.018                         | 37                                               | 17                                                |
| 33    |            | 6-311G(3d,3pd)  | -0.001                        | 0.018                         | 36                                               | 15                                                |
| 34    |            | 6-311G(3df)     | -0.004                        | 0.019                         | 41                                               | 24                                                |
| 35    |            | 6-311G(3df,p)   | -0.004                        | 0.020                         | 38                                               | 17                                                |
| 36    |            | 6-311G(3df,2p)  | -0.003                        | 0.018                         | 38                                               | 15                                                |
| 37    |            | 6-311G(3df,3p)  | -0.004                        | 0.019                         | 40                                               | 14                                                |
| 38    |            | 6-311G(3df,3pd) | -0.004                        | 0.018                         | 39                                               | 13                                                |
| 39    |            | 6-311+G(d)      | -0.002                        | 0.018                         | 41                                               | 44                                                |
| 40    |            | 6-311+G(d,p)    | -0.001                        | 0.018                         | 34                                               | 13                                                |
| 41    |            | 6-311+G(2d,2p)  | 0.001                         | 0.014                         | 21                                               | 9                                                 |
| 42    |            | 6-311++G(d)     | -0.002                        | 0.019                         | 40                                               | 42                                                |

|    |         |                   |        |        |     |     |
|----|---------|-------------------|--------|--------|-----|-----|
| 43 |         | 6-311++G(d,p)     | -0.001 | 0.019  | 34  | 12  |
| 44 |         | 6-311++G(2d,2p)   | 0.000  | 0.014  | 21  | 7   |
| 45 | BVWN    | 6-311G(2d,2p)     | 0.007  | 0.008  | 7   | 2   |
| 46 | BVWN5   | 6-311G(2d,2p)     | 0.008  | 0.011  | 2   | -6  |
| 47 | BLYP    | 6-311G(2d,2p)     | 0.007  | 0.019  | -6  | -11 |
| 48 | BPL     | 6-311G(2d,2p)     | 0.009  | -0.016 | 126 | -66 |
| 49 | BP86    | 6-311G(2d,2p)     | 0.003  | 0.018  | 17  | 6   |
| 50 | BB95    | 6-311G(2d,2p)     | 0.002  | 0.018  | 12  | -1  |
| 51 | BPBE    | 6-311G(2d,2p)     | 0.001  | 0.017  | 26  | 13  |
| 52 | BTPSS   | 6-311G(2d,2p)     | 0.001  | 0.018  | 24  | 11  |
| 53 | BVWN5   | 6-311+G(2d,2p)    | 0.008  | 0.008  | -4  | 61  |
| 54 |         | 6-311++G(2d,2p)   | 0.008  | 0.008  | -5  | -9  |
| 55 | mPWVWN  | 6-311G(2d,2p)     | 0.006  | 0.008  | 8   | 3   |
| 56 | mPWVWN5 | 6-311G(2d,2p)     | 0.007  | 0.011  | 3   | -14 |
| 57 | mPWLYP  | 6-311G(2d,2p)     | 0.007  | 0.017  | -3  | -8  |
| 58 | mPWPL   | 6-311G(2d,2p)     | 0.008  | 0.012  | 125 | -68 |
| 59 | mPWP86  | 6-311G(2d,2p)     | 0.002  | 0.019  | 18  | 5   |
| 60 | mPWB95  | 6-311G(2d,2p)     | 0.001  | 0.018  | 13  | -1  |
| 61 | mPWPBE  | 6-311G(2d,2p)     | 0.000  | 0.017  | 27  | 12  |
| 62 | mPWTPSS | 6-311G(2d,2p)     | 0.000  | 0.018  | 25  | 10  |
| 63 | mPWVWN  | 6-311+G(2d)       | 0.005  | 0.010  | 11  | 6   |
| 64 |         | 6-311+G(2d,p)     | 0.006  | 0.009  | 0   | 1   |
| 65 |         | 6-311+G(2d,2p)    | 0.006  | 0.006  | 2   | 1   |
| 66 |         | 6-311++G(2d,p)    | 0.006  | 0.009  | -1  | 0   |
| 67 |         | 6-311++G(2d,2p)   | 0.006  | 0.006  | 1   | 0   |
| 68 |         | 6-311++G(3df,3pd) | 0.002  | 0.008  | 7   | 6   |
| 69 |         | cc-pvdz           | 0.007  | 0.028  | 7   | 1   |
| 70 |         | aug-cc-pvdz       | 0.009  | 0.014  | 4   | 1   |
| 71 |         | aug-cc-pvtz       | 0.003  | 0.008  | 1   | 1   |
| 72 |         | aug-cc-pvqz       | 0.001  | 0.007  | 5   | 6   |
| 73 | PBEPBE  | 6-311G(2d,2p)     | 0.000  | 0.018  | 28  | 11  |
| 74 |         | 6-311++G(2d,2p)   | 0.000  | 0.016  | 25  | 4   |

**Table S2.** Experimental and Computational Results of NO Vibrational Frequencies and  $^1\text{H}$  NMR Chemical Shifts in HNO of Ru(TTP)(HNO)(1-MeIm)

|      | Metal Basis | $\nu_{\text{NO}}$ ( $\text{cm}^{-1}$ ) | $\delta_{\text{H}}$ (ppm) |
|------|-------------|----------------------------------------|---------------------------|
| Expt |             | 1380                                   | 13.64                     |
| Calc | SDD         | 1367                                   | 12.07                     |
|      | CEP-121G    | 1376                                   | 12.88                     |
|      | DGDZVP      | 1382                                   | 13.13                     |

**Table S3.** Geometric and Vibrational Results from Other Calculations <sup>a</sup>

|                       | System                                               | R <sub>NO</sub><br>(Å) | R <sub>MN</sub><br>(Å) | ∠M-N-O<br>(°) | v <sub>NO</sub><br>(cm <sup>-1</sup> ) | Δv <sub>NO</sub>  <br>(cm <sup>-1</sup> ) |
|-----------------------|------------------------------------------------------|------------------------|------------------------|---------------|----------------------------------------|-------------------------------------------|
| BVWN5/6-311G(2d,2p)   | <b>2</b> Ru(TTP)(HNO)(1-MeIm)                        | 1.245                  | 1.945                  | 132.1         | 1397                                   | 17                                        |
|                       | <b>3</b> Ru(HNO)(‘py <sup>bu</sup> S <sub>4</sub> ’) | 1.247                  | 1.961                  | 130.8         | 1387                                   | 29                                        |
|                       | <b>4</b> Fe(TPP)( <sup>t</sup> PrNO)(1-MeIm)         | 1.243                  | 1.862                  | 122.8         | 1435                                   | 2                                         |
|                       | <b>6</b> Fe(TPP)(NO)(1-MeIm)                         | 1.186                  | 1.736                  | 143.8         | 1644                                   | 14                                        |
|                       | <b>7</b> [Fe(OETPP)(NO)(1-MeIm)] <sup>+</sup>        | 1.152                  | 1.656                  | 180.0         | 1869                                   | 2                                         |
| Average               |                                                      |                        |                        |               |                                        | 12.8                                      |
| mPWVWN5/6-311G(2d,2p) | <b>2</b> Ru(TTP)(HNO)(1-MeIm)                        | 1.245                  | 1.944                  | 132.0         | 1399                                   | 19                                        |
|                       | <b>3</b> Ru(HNO)(‘py <sup>bu</sup> S <sub>4</sub> ’) | 1.247                  | 1.959                  | 130.6         | 1388                                   | 30                                        |
|                       | <b>4</b> Fe(TPP)( <sup>t</sup> PrNO)(1-MeIm)         | 1.243                  | 1.860                  | 122.9         | 1434                                   | 1                                         |
|                       | <b>6</b> Fe(TPP)(NO)(1-MeIm)                         | 1.186                  | 1.737                  | 142.8         | 1643                                   | 13                                        |
|                       | <b>7</b> [Fe(OETPP)(NO)(1-MeIm)] <sup>+</sup>        | 1.152                  | 1.656                  | 180.0         | 1872                                   | 1                                         |
| Average               |                                                      |                        |                        |               |                                        | 12.8                                      |

<sup>a</sup> |Δv<sub>NO</sub>| is the absolute error.

**Table S4.** Errors in the Predicted  $^{15}\text{N}$  NMR Isotropic Chemical Shifts

| Compound                                                     | Entry | Method                                  | $\Delta\delta_{\text{N}}$ (ppm) |
|--------------------------------------------------------------|-------|-----------------------------------------|---------------------------------|
| <b>8</b> $\text{NH}_3$                                       | 1     | BVWN/6-311++G(2d,2p)                    | 11.04                           |
|                                                              | 2     | BVWN5/6-311++G(2d,2p)                   | 10.55                           |
|                                                              | 3     | BLYP/6-311++G(2d,2p)                    | 6.03                            |
|                                                              | 4     | BPW91/6-311++G(2d,2p)                   | 4.77                            |
|                                                              | 5     | BP86/6-311++G(2d,2p)                    | 3.67                            |
|                                                              | 6     | mPWVWN/6-311++G(2d,2p)                  | 10.15                           |
|                                                              | 7     | mPWVWN5/6-311++G(2d,2p)                 | 9.67                            |
|                                                              | 8     | mPWLYP/6-311++G(2d,2p)                  | 5.11                            |
|                                                              | 9     | mPWPW91/6-311++G(2d,2p)                 | 3.93                            |
|                                                              | 10    | mPWP86/6-311++G(2d,2p)                  | 2.84                            |
|                                                              | 11    | G96P86/6-311++G(2d,2p)                  | 4.81                            |
|                                                              | 12    | PW91P86/6-311++G(2d,2p)                 | 2.05                            |
|                                                              | 13    | PBEP86/6-311++G(2d,2p)                  | 1.91                            |
|                                                              | 14    | OP86/6-311++G(2d,2p)                    | 0.74                            |
| <b>9</b> $\text{Fe}(\text{TPP})(\text{PhNO})(1\text{-MeIm})$ | 15    | B3LYP/6-311++G(2d,2p) Wachters 6-31G(d) | 242                             |
|                                                              | 16    | BPW91/6-311++G(2d,2p) Wachters 6-31G(d) | 41                              |
|                                                              | 17    | OP86/6-311++G(2d,2p) Wachters 6-31G(d)  | 9                               |
|                                                              | 18    | OP86/6-311++G(2d,2p) LanL2DZ 6-31G(d)   | 11                              |
|                                                              | 19    | OP86/6-311++G(2d,2p) CEP-121G 6-31G(d)  | 10                              |
|                                                              | 20    | OP86/6-311++G(2d,2p) SDD 6-31G(d)       | 16                              |

<sup>a</sup> The NMR calculations for  $\text{NH}_3$  were done on the geometry optimized by using B3LYP/6-311G(d), in which the optimized  $R_{\text{NH}}$  of 1.015 Å and  $\angle\text{H-N-H}$  of 106.7° are in good agreement with experimental results of 1.015 Å and  $\angle\text{H-N-H}$  of 107.3° (Bloemink, H. I.; Legon, A. C.; Thorn, J. C. *J. Chem. Soc. Faraday Trans.* **1995**, 91, 781-787.). The predicted NMR shift of **9** is referenced to the calculated shielding of  $\text{NH}_3$ .



**Table S5.**  $^{15}\text{N}$  NMR Chemical Shifts and Tensor Elements in RNO Iron Porphyrins <sup>a</sup>

| Compound                                     | Method       | $\delta_{\text{N}}$<br>(ppm) | $\delta_{11}$<br>(ppm) | $\delta_{22}$<br>(ppm) | $\delta_{33}$<br>(ppm) |
|----------------------------------------------|--------------|------------------------------|------------------------|------------------------|------------------------|
| <b>9</b> Fe(TPP)(PhNO)(1-MeIm)               | Expt         | 605                          | 1178                   | 464                    | 173                    |
|                                              | Calc         | 616                          | 1177                   | 484                    | 186                    |
| <b>10</b> Fe(TPP)(PhNO)(py)                  | Expt         | 607                          | 1265                   | 469                    | 87                     |
|                                              | Calc         | 632                          | 1215                   | 488                    | 193                    |
| <b>11</b> Fe(TPP)(NODMA)(py)                 | Expt         | 607                          | 1281                   | 456                    | 82                     |
|                                              | Calc         | 590                          | 1126                   | 470                    | 175                    |
| <b>12</b> Fe(OEP)(PhNO)(1-MeIm) <sup>b</sup> | Expt         | 593                          | 1247                   | 448                    | 84                     |
|                                              | Calc-average | 616                          | 1178                   | 482                    | 188                    |
|                                              | Calc-site 1  | 606                          | 1155                   | 475                    | 188                    |
|                                              | Calc-site 2  | 625                          | 1200                   | 488                    | 189                    |

<sup>a</sup> NMR calculations were performed using the OP86/6-311++G(2d,2p)|LanL2DZ|6-31G(d) method and results are referenced to the calculated shielding of  $\text{NH}_3$ . <sup>b</sup> The full OEP ligand was used in the calculations.

**Table S6.** Experimental Results of MbHNO and Computational Results of Fe(Por)(HNO)(5-MeIm)

|      | Metal Basis for<br>Geometry optimization<br>and Frequency<br>Calculation | Metal Basis for<br>NMR Chemical<br>Shift<br>Calculation | $R_{MN}$<br>(Å) | $R_{NO}$<br>(Å) | $\angle M-N-O$<br>(°) | $\nu_{NO}$<br>( $cm^{-1}$ ) | $\delta_H$<br>(ppm) |
|------|--------------------------------------------------------------------------|---------------------------------------------------------|-----------------|-----------------|-----------------------|-----------------------------|---------------------|
| Expt |                                                                          |                                                         | 1.820           | 1.241           | 131.0                 | 1385                        | 14.80               |
| Calc | LanL2DZ                                                                  | LanL2DZ                                                 | 1.790           | 1.243           | 133.1                 | 1411                        | 15.05               |
|      | SDD                                                                      | SDD                                                     | 1.802           | 1.244           | 132.7                 | 1404                        | 15.83               |
|      | CEP-121G                                                                 | CEP-121G                                                | 1.808           | 1.245           | 132.5                 | 1400                        | 15.45               |
|      | DGDZVP                                                                   | DGDZVP                                                  | 1.798           | 1.243           | 132.7                 | 1409                        | 17.02               |
|      | Wachters'                                                                | Wachters'                                               | 1.804           | 1.245           | 132.4                 | 1400                        | 17.17               |
|      |                                                                          | CEP-121G                                                |                 |                 |                       |                             | 15.95               |
|      |                                                                          | LanL2DZ                                                 |                 |                 |                       |                             | 15.42               |

**Table S7.** Optimized Structure of **1**

|   |               |    |               |
|---|---------------|----|---------------|
| H | 0.8121496358  | 0. | -0.553497328  |
| N | -0.1274626995 | 0. | -0.0439784187 |
| O | 0.0813575068  | 0. | 1.154688137   |

**Table S8.** Optimized Structure of **2**

|   |               |               |               |
|---|---------------|---------------|---------------|
| N | 1.4891285934  | 1.7809633747  | -0.0857602570 |
| N | -0.5520189598 | 1.0193775257  | 1.9457319337  |
| N | -1.7822973691 | -0.8632228815 | 0.0000935936  |
| N | 0.2487624019  | -0.0822091856 | -2.0348847970 |
| C | 2.3267957252  | 1.9989222056  | -1.1607822139 |
| C | 1.9194518436  | 2.5634543797  | 0.9664770424  |
| C | 1.2695261482  | 0.4107913478  | -2.8217515036 |
| C | -0.4538281197 | -1.0165764027 | -2.7674455857 |
| C | -2.1861660770 | -1.6793879215 | -1.0379779436 |
| C | -2.6375413665 | -1.0591829944 | 1.0660267194  |
| C | -1.5895322928 | 0.5455071729  | 2.7231492776  |
| C | 0.1769797551  | 1.9219200501  | 2.6942332223  |
| C | -2.5442538561 | -0.4066250514 | 2.3116855005  |
| H | -3.2973629395 | -0.6764043008 | 3.0493434345  |
| C | 1.3139430443  | 2.6216080143  | 2.2387674136  |
| H | 1.7807713624  | 3.2916436242  | 2.9582545195  |
| C | 2.2149260090  | 1.3725074825  | -2.4162890474 |
| H | 2.9599219625  | 1.6523166262  | -3.1582617235 |
| C | -1.5674273931 | -1.7469217168 | -2.3029358911 |
| H | -2.0065972620 | -2.4467761294 | -3.0112211027 |
| C | -3.6359541766 | -2.0508811867 | 0.6838297606  |
| C | -3.3583025278 | -2.4315126792 | -0.6065736193 |
| C | 0.1474745700  | -1.1130558160 | -4.0918561159 |
| C | 1.2044746511  | -0.2364545085 | -4.1253878997 |
| C | 3.3380756930  | 2.9739512672  | -0.7719548057 |
| C | 3.0888777892  | 3.3199090061  | 0.5334528212  |
| C | -0.4333037333 | 2.0284741556  | 4.0133166951  |
| C | -1.5174496546 | 1.1839105238  | 4.0313592564  |
| H | -0.1961295741 | -1.7709598078 | -4.8823652331 |
| H | 1.8840381952  | -0.0444023982 | -4.9479880416 |
| H | 4.1317059583  | 3.3349445874  | -1.4163751679 |
| H | 3.6423845699  | 4.0157214878  | 1.1543136576  |
| H | -0.0722551202 | 2.6634627320  | 4.8148592738  |
| H | -2.2063305348 | 1.0031517015  | 4.8489499429  |
| H | -4.4378252953 | -2.4024089752 | 1.3233845791  |
| H | -3.8913227856 | -3.1531519141 | -1.2156869315 |
| N | 1.0231723961  | -1.0125349919 | 0.6042315526  |
| H | 0.6069464453  | -1.6267903160 | 1.3332441486  |
| O | 2.1814485829  | -1.3595129429 | 0.2970255914  |
| N | -1.4962915110 | 2.1149169422  | -0.7633996498 |
| C | -2.4991689944 | 2.0365240281  | -1.7181638217 |
| C | -1.4743669667 | 3.3773079950  | -0.3461777114 |
| H | -0.8070921692 | 3.7806840285  | 0.4009565135  |
| C | -3.0859186395 | 3.2743876614  | -1.8716527083 |
| N | -2.4254050494 | 4.1284198407  | -0.9899014932 |

|    |               |              |               |
|----|---------------|--------------|---------------|
| H  | -2.7231557623 | 1.1079141182 | -2.2211167501 |
| Ru | -0.1110725136 | 0.4259965555 | -0.0330203955 |
| C  | -2.6917885225 | 5.5584974665 | -0.7899304843 |
| H  | -2.5365268873 | 6.1102969901 | -1.7237300560 |
| H  | -3.7211135799 | 5.7112870770 | -0.4469000791 |
| H  | -2.0045679270 | 5.9431739438 | -0.0325222696 |
| H  | -3.8875381355 | 3.6220282089 | -2.5069731509 |

**Table S9.** Optimized Structure of **3**

|    |               |               |               |
|----|---------------|---------------|---------------|
| Ru | 1.3122268633  | -0.8459342268 | 0.4536191033  |
| S  | -0.2448304614 | -1.0600151641 | -1.4428305745 |
| S  | -0.3256244203 | 0.6530266864  | 1.3915007219  |
| S  | 2.6092057432  | -2.7839900181 | -0.1906339191 |
| S  | 2.7227059686  | -0.8488806144 | 2.5097113498  |
| N  | 0.0798828985  | -2.3808113698 | 1.4743806615  |
| N  | 2.4094426118  | 0.5138153774  | -0.4198179359 |
| H  | 3.3986304178  | 0.2727940558  | -0.6279965209 |
| O  | 2.1332321998  | 1.6801495236  | -0.7736737975 |
| C  | -1.6547343807 | -0.0803504435 | -0.9798360604 |
| C  | -2.7785071319 | 0.0132977240  | -1.8677234372 |
| C  | -3.8659014419 | 0.8237393707  | -1.5122245771 |
| C  | -3.9154206292 | 1.5773572497  | -0.3170824657 |
| C  | -2.8133098626 | 1.4895348424  | 0.5443841085  |
| C  | -1.7182326141 | 0.6604351553  | 0.2258461324  |
| C  | -0.9060166391 | -0.5233694553 | 2.7490762101  |
| C  | 3.7447777493  | -2.2925866489 | 2.3418311738  |
| C  | 4.6776637943  | -2.6279979491 | 3.3821823129  |
| C  | 5.5128823805  | -3.7420498147 | 3.2225104035  |
| C  | 5.5033520330  | -4.5630500741 | 2.0707796538  |
| C  | 4.5965692936  | -4.2328812442 | 1.0551587468  |
| C  | 3.7228710772  | -3.1343601322 | 1.2004813875  |
| C  | 1.2141992657  | -4.0309982828 | 0.0492067500  |
| C  | -0.8438636169 | -1.9964073068 | 2.3909108905  |
| C  | -1.6684990065 | -2.9426070563 | 3.0223773584  |
| C  | -1.4958353068 | -4.3023325754 | 2.7310236803  |
| C  | -0.5227020403 | -4.6838362851 | 1.7974889865  |
| C  | 0.2398221933  | -3.6905007666 | 1.1612187582  |
| C  | -2.7958875129 | -0.7417561695 | -3.1869173441 |
| C  | -5.1172178680 | 2.4519106851  | 0.0097819139  |
| C  | 4.7726134987  | -1.7857012061 | 4.6438042139  |
| C  | 6.4543970611  | -5.7440297320 | 1.9409876858  |
| H  | 7.5030617647  | -5.4154441628 | 1.9088412444  |
| H  | 6.3616823936  | -6.4328081310 | 2.7922061899  |
| H  | 6.2599392051  | -6.3165175520 | 1.0266102502  |
| H  | 5.0581239567  | -0.7504048814 | 4.4122424245  |
| H  | 3.8067132319  | -1.7315644934 | 5.1643841446  |
| H  | 5.5145795903  | -2.2004920404 | 5.3354278266  |
| H  | 6.2119557964  | -3.9777955671 | 4.0249104265  |
| H  | 4.5626569301  | -4.8253156049 | 0.1418612165  |
| H  | 0.6981830300  | -4.0073239454 | -0.9186643351 |
| H  | 1.6588673720  | -5.0211746927 | 0.1858120140  |
| H  | -0.3685863922 | -5.7300181270 | 1.5479529092  |
| H  | -2.1105876201 | -5.0525168074 | 3.2224157454  |
| H  | -2.4155991069 | -2.6169206911 | 3.7409063462  |

|   |               |               |               |
|---|---------------|---------------|---------------|
| H | -0.2071774559 | -0.3089826371 | 3.5670673931  |
| H | -1.9109569807 | -0.2244112679 | 3.0616361121  |
| H | -4.7081841524 | 0.8832203165  | -2.2014673385 |
| H | -1.9635502188 | -0.4330032131 | -3.8338733583 |
| H | -2.6852653694 | -1.8239063134 | -3.0323463735 |
| H | -3.7336370737 | -0.5652640332 | -3.7258792655 |
| H | -2.7945285034 | 2.0694754704  | 1.4659664390  |
| H | -5.3282410263 | 3.1642035628  | -0.7996234883 |
| H | -6.0276507860 | 1.8519607157  | 0.1528232059  |
| H | -4.9540907022 | 3.0299899611  | 0.9267647003  |

**Table S10.** Optimized Structure of **4**

|    |               |               |               |
|----|---------------|---------------|---------------|
| Fe | -0.1604608492 | 0.0502358273  | -0.2001491297 |
| O  | -1.3101101454 | 0.4753642524  | -2.6499631562 |
| N  | 1.3951456117  | 0.4590706769  | -1.4519130543 |
| N  | -0.6964544664 | 2.0154577405  | -0.2057522179 |
| N  | -1.6205210043 | -0.3390917981 | 1.1861026452  |
| N  | 0.4694434719  | -1.8980483708 | -0.0635006901 |
| N  | 1.1747064132  | 0.4933883868  | 1.4866998744  |
| N  | 2.9808174391  | 0.5188646395  | 2.7962087008  |
| N  | -1.2667089479 | -0.2695346781 | -1.6548099765 |
| C  | 2.2790548584  | -0.4519284248 | -2.0006189138 |
| C  | 3.1855217467  | 0.2272965183  | -2.9137475114 |
| H  | 3.9739251817  | -0.2589434624 | -3.4774920701 |
| C  | 2.8369414574  | 1.5520016611  | -2.9077245733 |
| H  | 3.2824805817  | 2.3679908568  | -3.4654231264 |
| C  | 1.7102754319  | 1.6882619187  | -1.9977947848 |
| C  | 1.0345221677  | 2.8852066280  | -1.7367834642 |
| C  | -0.0931166784 | 3.0308939566  | -0.9217639430 |
| C  | -0.8197712337 | 4.2757597447  | -0.7245128358 |
| H  | -0.5512985679 | 5.2252220259  | -1.1736368944 |
| C  | -1.8727106052 | 3.9942295175  | 0.1045626640  |
| H  | -2.6392598309 | 4.6674208108  | 0.4716958828  |
| C  | -1.7899932967 | 2.5774515276  | 0.4261566786  |
| C  | -2.6706980645 | 1.8959639591  | 1.2760192388  |
| C  | -2.5767146050 | 0.5484873540  | 1.6482517847  |
| C  | -3.4392548302 | -0.1129870369 | 2.6137946819  |
| H  | -4.2707848160 | 0.3591202894  | 3.1250413552  |
| C  | -2.9834280457 | -1.3995708376 | 2.7405202871  |
| H  | -3.3689425027 | -2.1907901080 | 3.3736481157  |
| C  | -1.8465614490 | -1.5352517404 | 1.8438674851  |
| C  | -1.1106444578 | -2.7123210928 | 1.6546836326  |
| C  | -0.0449633609 | -2.8833612450 | 0.7610535889  |
| C  | 0.6683323611  | -4.1315764074 | 0.5443454861  |
| H  | 0.4602738041  | -5.0604914723 | 1.0634253680  |
| C  | 1.6149905091  | -3.8881007549 | -0.4175077352 |
| H  | 2.3367459973  | -4.5782895856 | -0.8401261872 |
| C  | 1.4927628142  | -2.4873511958 | -0.7866449676 |
| C  | 2.3180630341  | -1.8206013402 | -1.7025653415 |
| C  | 0.9069989748  | 1.2735983699  | 2.6018284472  |
| H  | -0.0503002765 | 1.7536627732  | 2.7346357226  |
| C  | 2.0127305769  | 1.3013349753  | 3.4241053770  |
| H  | 2.2005046728  | 1.7889975147  | 4.3697506536  |
| C  | 4.3378959059  | 0.2442047921  | 3.2833714667  |
| H  | 4.3005439572  | -0.2525628374 | 4.2594221096  |
| H  | 4.9085860156  | 1.1753569810  | 3.3744991058  |
| H  | 4.8428136456  | -0.4127337860 | 2.5709001338  |



|   |               |               |               |
|---|---------------|---------------|---------------|
| C | 2.4218267612  | 0.0562906475  | 1.6312409950  |
| H | 2.9499295133  | -0.5807613108 | 0.9379643688  |
| C | -2.2264903523 | -1.4771004538 | -1.7636838289 |
| H | -2.0854528330 | -2.0409318731 | -0.8462621094 |
| C | -1.8246494098 | -2.3414363465 | -2.9738450954 |
| H | -0.7897850068 | -2.6883201014 | -2.8852647765 |
| H | -1.9306167216 | -1.7784207850 | -3.9073013251 |
| H | -2.4787323968 | -3.2221579151 | -3.0176733162 |
| C | -3.6783111990 | -0.9677420999 | -1.8447645950 |
| H | -3.9306456146 | -0.3537555250 | -0.9739004941 |
| H | -4.3593341502 | -1.8286144707 | -1.8659249433 |
| H | -3.8330224008 | -0.3749631087 | -2.7527288970 |
| H | 3.0760616190  | -2.4149054462 | -2.2079759455 |
| H | 1.3966852896  | 3.7770843991  | -2.2427870210 |
| H | -3.4835920041 | 2.4731856076  | 1.7107544455  |
| H | -1.4074494533 | -3.5792894227 | 2.2405679841  |

**Table S11.** Optimized Structure of **5**

|    |               |               |              |
|----|---------------|---------------|--------------|
| Fe | -0.4564702536 | 6.7002838742  | 5.1060710812 |
| O  | 1.8729028571  | 8.1048702090  | 5.4173503430 |
| N  | -0.1660507138 | 4.7622656519  | 5.7280664590 |
| N  | 0.6259284432  | 6.3299173191  | 3.4209887916 |
| N  | -1.6898218430 | 7.0011485134  | 6.7198959564 |
| N  | 1.0607595976  | 7.3359870385  | 5.9619370485 |
| C  | -0.6796607100 | 4.1575647900  | 6.8643089760 |
| C  | -0.2005128178 | 2.7884852927  | 6.9546102711 |
| C  | 0.5993362424  | 2.5733241250  | 5.8605572067 |
| C  | 0.6128122721  | 3.8078310601  | 5.0948689996 |
| C  | 1.2882918658  | 3.9937608634  | 3.8818744858 |
| H  | 1.8621667688  | 3.1504661456  | 3.5043064288 |
| C  | 1.2883299139  | 5.1589548145  | 3.1059889379 |
| C  | 2.0020936209  | 5.3169811813  | 1.8473668381 |
| C  | 1.7698595410  | 6.5955767801  | 1.4167504445 |
| C  | 0.9123744527  | 7.2255399798  | 2.4093690880 |
| C  | -2.3633822246 | 8.1696098714  | 7.0283868765 |
| C  | -3.1350177523 | 7.9892000597  | 8.2475430302 |
| C  | -2.9255221169 | 6.7011343522  | 8.6658902513 |
| C  | -2.0221316702 | 6.0876112359  | 7.7049452576 |
| C  | -1.5480062489 | 4.7708322487  | 7.7785389934 |
| H  | -1.8822590341 | 4.1713191398  | 8.6223563111 |
| C  | 1.4549563608  | 6.9740505101  | 7.4116373907 |
| H  | 0.6720496973  | 6.3111776521  | 7.7674463505 |
| C  | 2.8040070658  | 6.2296231854  | 7.4005595629 |
| H  | 2.7542469336  | 5.3322802653  | 6.7748069360 |
| H  | 3.0513276492  | 5.9204513046  | 8.4245507999 |
| H  | 3.6039667685  | 6.8773296932  | 7.0260997049 |
| C  | 1.4810733118  | 8.2538535330  | 8.2692557003 |
| H  | 0.5094288961  | 8.7588493846  | 8.2550905805 |
| H  | 2.2467855848  | 8.9494343458  | 7.9095819123 |
| H  | 1.7112509946  | 7.9833526225  | 9.3081477668 |
| N  | -0.8656525661 | 8.5785587511  | 4.4319574474 |
| C  | 0.4594362873  | 8.5478078147  | 2.3487039839 |
| H  | 0.7796950987  | 9.1420583071  | 1.4960742022 |
| C  | -0.3535004832 | 9.1792809798  | 3.2964065710 |
| C  | -0.8042921952 | 10.5598037452 | 3.2212046536 |
| C  | -1.5866010213 | 10.7832336417 | 4.3236235366 |
| C  | -1.6177466861 | 9.5408766874  | 5.0795798240 |
| C  | -2.3167449028 | 9.3506223602  | 6.2777155229 |
| N  | -2.2442683904 | 5.9876336368  | 4.0026237494 |
| N  | -3.9170029981 | 4.6874103675  | 3.3012093547 |
| C  | -2.9464170384 | 6.6569815199  | 3.0106846255 |
| H  | -2.6583173518 | 7.6467131291  | 2.6931697175 |
| C  | -3.9841411107 | 5.8686100316  | 2.5633481379 |

|   |               |               |              |
|---|---------------|---------------|--------------|
| C | -2.8481932705 | 4.8126037779  | 4.1520273442 |
| H | -2.5574849104 | 4.0410912487  | 4.8480261153 |
| C | -4.8004277840 | 3.5220336309  | 3.1740788384 |
| H | -4.5376089972 | 2.7934538567  | 3.9450214372 |
| H | -4.6845955368 | 3.0556496459  | 2.1888653891 |
| H | -5.8453923369 | 3.8213722025  | 3.3104811693 |
| H | -2.8820613648 | 10.1985516278 | 6.6576072640 |
| H | -3.7524188167 | 8.7531829675  | 8.7066826422 |
| H | -3.3359186954 | 6.2000052437  | 9.5354110415 |
| H | -0.4510988537 | 2.0968677047  | 7.7512685011 |
| H | 1.1323689605  | 1.6698539993  | 5.5858443230 |
| H | 2.6002317503  | 4.5454801667  | 1.3755243547 |
| H | 2.1367846192  | 7.0820361744  | 0.5200637389 |
| H | -2.0957380353 | 11.6954923288 | 4.6137657035 |
| H | -0.5463918745 | 11.2512975845 | 2.4270482934 |
| H | -4.7447149489 | 6.0284698250  | 1.8127337370 |

**Table S12.** Optimized Structure of **6**

|   |               |               |              |
|---|---------------|---------------|--------------|
| O | 2.0527854630  | 7.9419205540  | 5.8237961840 |
| N | -0.0883653910 | 4.6765750390  | 5.6803367630 |
| N | 0.7503821270  | 6.3089408400  | 3.4449934940 |
| N | -1.6049643360 | 6.9099309360  | 6.7321061020 |
| N | 1.1055312640  | 7.2429624980  | 5.9910930070 |
| C | -0.5575301020 | 4.0757787240  | 6.8334561630 |
| C | -0.0893314640 | 2.7005515820  | 6.8972427210 |
| C | 0.6657476810  | 2.4838250850  | 5.7736055110 |
| C | 0.6675297050  | 3.7270734520  | 5.0207540820 |
| C | 1.3416146730  | 3.9344330000  | 3.8115397040 |
| H | 1.8970724020  | 3.0931011950  | 3.4041928680 |
| C | 1.3813282330  | 5.1305590790  | 3.0869938450 |
| C | 2.1097812100  | 5.3215245620  | 1.8442450140 |
| C | 1.9229699380  | 6.6253266290  | 1.4673912700 |
| C | 1.0724426710  | 7.2382779130  | 2.4733410220 |
| C | -2.2868429200 | 8.0644695040  | 7.0588756780 |
| C | -3.0172377170 | 7.8731234190  | 8.3019447840 |
| C | -2.7577698730 | 6.5949768490  | 8.7215116050 |
| C | -1.8722269870 | 5.9980121080  | 7.7332315620 |
| C | -1.3797289630 | 4.6882301960  | 7.7878377310 |
| H | -1.6706709060 | 4.0872764780  | 8.6463223560 |
| N | -0.7562466520 | 8.5329770690  | 4.4897816630 |
| C | 0.6323440330  | 8.5663409070  | 2.4481533420 |
| H | 0.9750865640  | 9.1856125730  | 1.6228475470 |
| C | -0.2216635700 | 9.1645535910  | 3.3817282300 |
| C | -0.7030618430 | 10.5335891800 | 3.3158190680 |
| C | -1.5280592300 | 10.7187328300 | 4.3946162350 |
| C | -1.5510536400 | 9.4670229190  | 5.1316518450 |
| C | -2.2670481360 | 9.2494268230  | 6.3141006220 |
| N | -2.3234390400 | 5.9335936710  | 3.8822059270 |
| N | -4.1270141330 | 4.7505944070  | 3.2955450640 |
| C | -2.9422138960 | 6.5581827880  | 2.8113470110 |
| H | -2.5442054400 | 7.4699983580  | 2.3897331410 |
| C | -4.0598429530 | 5.8436028590  | 2.4318511340 |
| C | -3.0526299460 | 4.8577854410  | 4.1473846480 |
| H | -2.8546456190 | 4.1414655620  | 4.9320192380 |
| C | -5.1457099240 | 3.6941729450  | 3.2955200290 |
| H | -4.9219719610 | 2.9880810220  | 4.0992404580 |
| H | -5.1431511150 | 3.1565102360  | 2.3404029520 |
| H | -6.1409344410 | 4.1205664120  | 3.4653708450 |
| H | -2.8503603400 | 10.0834736900 | 6.6968450250 |
| H | -3.6355733070 | 8.6255390250  | 8.7781797840 |
| H | -3.1226555190 | 6.0909121760  | 9.6093687590 |
| H | -0.3150439270 | 2.0072340430  | 7.6996789780 |
| H | 1.1822342650  | 1.5787925890  | 5.4743826050 |

|    |               |               |              |
|----|---------------|---------------|--------------|
| H  | 2.6853516390  | 4.5519273750  | 1.3427011910 |
| H  | 2.3119553620  | 7.1361456770  | 0.5939662510 |
| H  | -2.0718070000 | 11.6120490200 | 4.6800754580 |
| H  | -0.4393318600 | 11.2440997300 | 2.5407443700 |
| H  | -4.7955066130 | 5.9986485630  | 1.6554100790 |
| Fe | -0.3069184640 | 6.6576988710  | 5.1461170380 |

**Table S13.** Optimized Structure of **7**

|   |               |               |              |
|---|---------------|---------------|--------------|
| O | 1.8005928600  | 7.4759893277  | 6.5107487500 |
| N | -0.1378992819 | 4.6499057082  | 5.6027237272 |
| N | 0.6642543337  | 6.3079982051  | 3.3540680299 |
| N | -1.6840877457 | 6.8451230528  | 6.6688705646 |
| N | 0.8838679514  | 7.1196489146  | 5.9134692311 |
| C | -0.5187519829 | 4.0630259734  | 6.7994360072 |
| C | -0.0174140239 | 2.7027682430  | 6.8449866374 |
| C | 0.6647769900  | 2.4832345102  | 5.6761833237 |
| C | 0.6062318021  | 3.7116488313  | 4.9071511595 |
| C | 1.2426622248  | 3.9232723738  | 3.6806558453 |
| H | 1.7905222875  | 3.0858458982  | 3.2583722534 |
| C | 1.2935761973  | 5.1324062333  | 2.9812416672 |
| C | 2.0575708775  | 5.3625381245  | 1.7696816395 |
| C | 1.9082399457  | 6.6846720097  | 1.4408221410 |
| C | 1.0356555907  | 7.2776521666  | 2.4363278640 |
| C | -2.4042493732 | 7.9855893700  | 6.9828078033 |
| C | -3.0747392940 | 7.7919037233  | 8.2543100351 |
| C | -2.7257074207 | 6.5476565330  | 8.7122609420 |
| C | -1.8514232686 | 5.9549630956  | 7.7182740845 |
| C | -1.3022450253 | 4.6700679591  | 7.7868051210 |
| H | -1.5189535530 | 4.0854303456  | 8.6762579564 |
| N | -0.8809187291 | 8.5021427414  | 4.4198531745 |
| C | 0.6029726150  | 8.6077203653  | 2.4421462066 |
| H | 0.9808860284  | 9.2555014500  | 1.6564827472 |
| C | -0.2963603529 | 9.1687148157  | 3.3547685969 |
| C | -0.7996144681 | 10.5282849267 | 3.3072735040 |
| C | -1.6813966099 | 10.6699296392 | 4.3469436000 |
| C | -1.7159979209 | 9.4048493162  | 5.0560989793 |
| C | -2.4449172846 | 9.1582823723  | 6.2230155032 |
| N | -2.1015956214 | 5.9571710149  | 3.9784777806 |
| N | -3.9760733027 | 4.8949670489  | 3.4443578886 |
| C | -2.4620954523 | 6.3294244010  | 2.6894168667 |
| H | -1.8763102470 | 7.0240240568  | 2.1102921278 |
| C | -3.6235312993 | 5.6772164186  | 2.3465172978 |
| C | -3.0307542462 | 5.0946084722  | 4.4050127142 |
| H | -3.0506736386 | 4.6121549175  | 5.3689438493 |
| C | -5.1557113467 | 4.0135307370  | 3.5467635962 |
| H | -5.1560000569 | 3.5360939991  | 4.5287043671 |
| H | -5.1131324908 | 3.2434978888  | 2.7706789123 |
| H | -6.0708142491 | 4.6019521923  | 3.4310102550 |
| H | -3.0590391574 | 9.9701842372  | 6.6016941550 |
| H | -3.7148805714 | 8.5261723414  | 8.7280990392 |
| H | -3.0284193718 | 6.0614172878  | 9.6317538955 |
| H | -0.1789455725 | 2.0161659031  | 7.6671967818 |
| H | 1.1758895944  | 1.5833024282  | 5.3563188258 |

|    |               |               |              |
|----|---------------|---------------|--------------|
| H  | 2.6364280474  | 4.6042881183  | 1.2565006783 |
| H  | 2.3359862249  | 7.2207302298  | 0.6023153319 |
| H  | -2.2538803118 | 11.5457736531 | 4.6271026272 |
| H  | -0.5123078420 | 11.2633823983 | 2.5653097221 |
| H  | -4.2169026239 | 5.6972553789  | 1.4444178001 |
| Fe | -0.4349698342 | 6.6061206510  | 5.0586783920 |

**Table S14.** Optimized Structure of **13**

|   |               |               |               |
|---|---------------|---------------|---------------|
| N | 1.4417542132  | 1.7741064661  | -0.1276822705 |
| N | -0.5351876267 | 1.0706361231  | 1.8702294864  |
| N | -1.7569517897 | -0.7678479275 | 0.0084402930  |
| N | 0.2295393635  | -0.0683834278 | -1.9816368047 |
| C | 2.2776268451  | 2.0016461040  | -1.2040898077 |
| C | 1.9184181139  | 2.5526835335  | 0.9109906919  |
| C | 1.2342460182  | 0.4036061382  | -2.8043710243 |
| C | -0.4421959722 | -1.0407766871 | -2.6998755784 |
| C | -2.1654819095 | -1.6326367127 | -0.9916638588 |
| C | -2.6414988183 | -0.9349873382 | 1.0581894297  |
| C | -1.5809408605 | 0.6465849309  | 2.6705699703  |
| C | 0.2177240346  | 1.9446313824  | 2.6367391718  |
| C | -2.5668665148 | -0.2726553351 | 2.2897822225  |
| H | -3.3295068690 | -0.5126571879 | 3.0269222934  |
| C | 1.3597421453  | 2.6243763564  | 2.1937862082  |
| H | 1.8518117675  | 3.2794562624  | 2.9091476215  |
| C | 2.1731736191  | 1.3786970967  | -2.4521349915 |
| H | 2.9095312119  | 1.6512079186  | -3.2044235286 |
| C | -1.5471076799 | -1.7695073864 | -2.2407720857 |
| H | -1.9741364809 | -2.4994400067 | -2.9246530071 |
| C | -3.6439806652 | -1.9276695621 | 0.7052308363  |
| C | -3.3465231286 | -2.3620725704 | -0.5601154260 |
| C | 0.1528234265  | -1.1776103954 | -4.0199482956 |
| C | 1.1864536432  | -0.2811587558 | -4.0861021835 |
| C | 3.3035404519  | 2.9651156068  | -0.8388815308 |
| C | 3.0840200770  | 3.3028497136  | 0.4702794099  |
| C | -0.3753427010 | 2.0773744057  | 3.9568767271  |
| C | -1.4895840252 | 1.2784505555  | 3.9765850564  |
| H | -0.1845246641 | -1.8734892212 | -4.7798574554 |
| H | 1.8657675339  | -0.0962980137 | -4.9104226112 |
| H | 4.0849682642  | 3.3164882234  | -1.5030418155 |
| H | 3.6497571680  | 3.9866598219  | 1.0930861521  |
| H | 0.0190603589  | 2.7005149388  | 4.7517444140  |
| H | -2.1872965586 | 1.1172961708  | 4.7906360047  |
| H | -4.4552518529 | -2.2428471498 | 1.3516875209  |
| H | -3.8674291736 | -3.1026163158 | -1.1565692367 |
| N | 0.9219479895  | -0.8636733373 | 0.5820413881  |
| H | 0.5177504022  | -1.4015414160 | 1.3755826398  |
| O | 2.0487020383  | -1.2792753051 | 0.2521019054  |
| N | -1.4281047800 | 2.0675911443  | -0.7757255047 |
| C | -2.2716104903 | 2.0389012253  | -1.8794373549 |
| C | -1.5594429595 | 3.2730078924  | -0.2366084624 |
| H | -1.0437036026 | 3.6333965334  | 0.6403012610  |
| C | -2.9278040086 | 3.2464555275  | -2.0173602784 |
| N | -2.4564130018 | 4.0236255890  | -0.9542821500 |



|    |               |              |               |
|----|---------------|--------------|---------------|
| H  | -2.3517592430 | 1.1579764899 | -2.4979637516 |
| C  | -3.9293766063 | 3.7441104609 | -3.0213654092 |
| H  | -4.8793137753 | 4.0330785874 | -2.5493242994 |
| H  | -3.5571570885 | 4.6152406708 | -3.5794468944 |
| H  | -4.1474485580 | 2.9547264098 | -3.7476357136 |
| H  | -2.7265881787 | 4.9768657577 | -0.7462964745 |
| Fe | -0.1176344530 | 0.4685315446 | -0.0508699392 |

**Table S15.** Optimized Structure of **14**

|   |               |               |               |
|---|---------------|---------------|---------------|
| N | -1.1596343889 | 1.6263154123  | 0.3824048760  |
| N | 1.5046790053  | 1.4961147457  | -0.7398580099 |
| N | 1.1917365177  | -1.3413100571 | -1.1430515585 |
| N | -1.4736505017 | -1.2010280638 | -0.0221698384 |
| C | -2.4099566428 | 1.4867440911  | 0.9563207997  |
| C | -0.8606449179 | 2.9767270521  | 0.4180667888  |
| C | -2.6748757024 | -0.9641029632 | 0.6192895788  |
| C | -1.4693574284 | -2.5417185922 | -0.3639631089 |
| C | 0.8267951673  | -2.6623676551 | -1.3381136571 |
| C | 2.4968799324  | -1.2249289170 | -1.5854138211 |
| C | 2.7685410153  | 1.2292267850  | -1.2356536829 |
| C | 1.4390510445  | 2.8664481417  | -0.5489087153 |
| C | 3.2366585347  | -0.0360694667 | -1.6113791823 |
| H | 4.2538781256  | -0.0944149005 | -1.9912418689 |
| C | 0.3358988629  | 3.5540320472  | -0.0274751902 |
| H | 0.4260703509  | 4.6339610355  | 0.0641740222  |
| C | -3.1026831035 | 0.2797895760  | 1.0937679806  |
| H | -4.0834805646 | 0.3210326746  | 1.5599185607  |
| C | -0.4133490112 | -3.2142012510 | -0.9930087971 |
| H | -0.5577193146 | -4.2715111570 | -1.2028403263 |
| C | 2.9732435506  | -2.5136148523 | -2.0602349707 |
| C | 1.9380342549  | -3.4000791205 | -1.9145986620 |
| C | -2.7098675620 | -3.1645276151 | 0.0697972415  |
| C | -3.4499586833 | -2.1913469074 | 0.6880134023  |
| C | -2.9118551865 | 2.7859698916  | 1.3703643230  |
| C | -1.9575639617 | 3.7081953474  | 1.0306218304  |
| C | 2.7006249913  | 3.4778324792  | -0.9311639212 |
| C | 3.5251553813  | 2.4652992562  | -1.3484054769 |
| H | -2.9611633129 | -4.2086520918 | -0.0790917667 |
| H | -4.4330217256 | -2.2745861638 | 1.1364271518  |
| H | -3.8726735309 | 2.9534998884  | 1.8430974488  |
| H | -1.9790504746 | 4.7826965589  | 1.1732937358  |
| H | 2.9129513894  | 4.5397831768  | -0.8797413978 |
| H | 4.5452994279  | 2.5338992743  | -1.7088837006 |
| H | 3.9653006933  | -2.6969570360 | -2.4570564716 |
| H | 1.9154291214  | -4.4545711718 | -2.1654356919 |
| N | -0.6119968709 | 0.4642030172  | -2.0927127717 |
| H | 0.1327960560  | 0.5353688726  | -2.8123376868 |
| O | -1.7502004545 | 0.6191731645  | -2.5918076728 |
| N | 0.7982165890  | -0.2236202581 | 1.5605321255  |
| C | 0.9930908131  | -1.4549483044 | 2.1746665362  |
| C | 1.2006725758  | 0.6954367675  | 2.4294632694  |
| H | 1.1877932513  | 1.7634345197  | 2.2738244205  |
| C | 1.5227602224  | -1.2847599759 | 3.4386490884  |
| N | 1.6480313265  | 0.1007414604  | 3.5815435700  |

|    |               |               |               |
|----|---------------|---------------|---------------|
| H  | 0.7404112657  | -2.3762268412 | 1.6722625631  |
| C  | 1.9158169790  | -2.2632898052 | 4.5094040928  |
| H  | 2.9828239349  | -2.1908204244 | 4.7641043894  |
| H  | 1.3421707438  | -2.1149342700 | 5.4354234204  |
| H  | 1.7269076570  | -3.2843595374 | 4.1631710342  |
| H  | 2.0069192268  | 0.5866446429  | 4.3939478312  |
| Fe | -0.0186808954 | 0.1544058439  | -0.4273635924 |
| H  | -3.7546870323 | 0.3609634795  | -2.1329712584 |
| O  | -4.6294435219 | -0.0709926075 | -2.1904379386 |
| H  | -4.3841353218 | -1.0041723996 | -2.3247991385 |

**Table S16.** Optimized Structure of **15**

|   |               |               |               |
|---|---------------|---------------|---------------|
| N | 1.2021418480  | 0.8767772553  | -0.0026110448 |
| N | 0.7545737094  | -1.9076571159 | -0.6465606539 |
| N | -1.9122173996 | -1.2692690956 | -1.5345015544 |
| N | -1.4595845891 | 1.5114230561  | -0.8925003513 |
| C | 1.2205770794  | 2.2286388456  | 0.2811467246  |
| C | 2.4660656532  | 0.3986129042  | 0.2931693214  |
| C | -1.0828831220 | 2.7778478290  | -0.4877712771 |
| C | -2.7229158990 | 1.6372466763  | -1.4399082301 |
| C | -3.1189681699 | -0.7652752237 | -1.9877842898 |
| C | -1.9804595661 | -2.6417892134 | -1.6890399137 |
| C | 0.3262418182  | -3.1966864640 | -0.9089228058 |
| C | 2.0797655734  | -2.0073947297 | -0.2544144829 |
| C | -0.9491908301 | -3.5409048168 | -1.3821710032 |
| H | -1.1499269751 | -4.5981003793 | -1.5424433257 |
| C | 2.8786037735  | -0.9336567254 | 0.1615516570  |
| H | 3.9059948595  | -1.1611224350 | 0.4370264373  |
| C | 0.1516189683  | 3.1082856066  | 0.0798544553  |
| H | 0.3112682530  | 4.1503985897  | 0.3463747830  |
| C | -3.4866762300 | 0.5855830533  | -1.9617960875 |
| H | -4.4679155227 | 0.8376288004  | -2.3573445118 |
| C | -3.2683989019 | -3.0140827839 | -2.2539561609 |
| C | -3.9679409911 | -1.8519989565 | -2.4475242839 |
| C | -3.1585645318 | 3.0235539126  | -1.3680415911 |
| C | -2.1472752266 | 3.7276915243  | -0.7715922614 |
| C | 2.5279977856  | 2.6117129996  | 0.7894615766  |
| C | 3.3009559253  | 1.4812136200  | 0.7897479945  |
| C | 2.4996105551  | -3.3982660458 | -0.2830760722 |
| C | 1.4119383509  | -4.1361414596 | -0.6776094000 |
| H | -4.1118966588 | 3.3905811365  | -1.7311666883 |
| H | -2.1039486044 | 4.7879003364  | -0.5497301410 |
| H | 2.8041503953  | 3.6164372258  | 1.0884586671  |
| H | 4.3369792323  | 1.3739629744  | 1.0908978460  |
| H | 3.4907882895  | -3.7510250696 | -0.0204417374 |
| H | 1.3387054427  | -5.2105048451 | -0.8054572002 |
| H | -3.5771503152 | -4.0300178032 | -2.4730643396 |
| H | -4.9651171716 | -1.7271579949 | -2.8543017004 |
| N | 0.2907338608  | 0.0894750705  | -2.4921172086 |
| H | 0.3609160390  | -0.7436309516 | -3.1152944687 |
| O | 0.6845476567  | 1.1291758502  | -3.0566776925 |
| N | -1.0960963717 | -0.5381396337 | 1.2187446901  |
| C | -2.3943807145 | -0.3621080068 | 1.6812580933  |
| C | -0.3835828952 | -0.9524701253 | 2.2584282793  |
| H | 0.6710277086  | -1.1832072156 | 2.2525846933  |
| C | -2.4759114583 | -0.6737137256 | 3.0245868664  |
| N | -1.1753911376 | -1.0496282838 | 3.3752338570  |

|    |               |               |               |
|----|---------------|---------------|---------------|
| H  | -3.1805693527 | -0.0236296153 | 1.0233501530  |
| C  | -3.6201128939 | -0.6574148408 | 3.9990059003  |
| H  | -3.8189830900 | -1.6532158974 | 4.4204778259  |
| H  | -3.4380674894 | 0.0283770175  | 4.8388575212  |
| H  | -4.5315447963 | -0.3246991233 | 3.4921980586  |
| H  | -0.8665576607 | -1.3432071433 | 4.2935501303  |
| Fe | -0.3327802234 | -0.1730536514 | -0.8190461289 |
| O  | 0.8322605613  | -2.4170508322 | -4.1597283456 |
| H  | 1.7095412509  | -2.5832670178 | -3.7659652198 |
| H  | 0.2357041989  | -2.9736370628 | -3.6208053587 |

**Table S17.** Optimized Structure of **16**

|   |               |               |               |
|---|---------------|---------------|---------------|
| N | -1.2063264450 | 1.5413925794  | 0.6495145818  |
| N | 1.6038049069  | 1.4165454202  | -0.0148288223 |
| N | 1.2343415889  | -1.2408270934 | -1.0632607172 |
| N | -1.5746899356 | -1.1095461245 | -0.3945777876 |
| C | -2.5423971591 | 1.3913835395  | 0.9707380324  |
| C | -0.8626860509 | 2.8349865583  | 0.9988476544  |
| C | -2.8547066226 | -0.9148167915 | 0.0882730304  |
| C | -1.5766332972 | -2.3413247290 | -1.0235658010 |
| C | 0.8483118042  | -2.4537791621 | -1.6063882249 |
| C | 2.6074537558  | -1.1666024035 | -1.2083148926 |
| C | 2.9296951585  | 1.1317141190  | -0.2870127123 |
| C | 1.5676791128  | 2.7263916225  | 0.4355798869  |
| C | 3.4009290789  | -0.0760415716 | -0.8237820183 |
| H | 4.4738474232  | -0.1631916201 | -0.9814862603 |
| C | 0.4175350917  | 3.3918264633  | 0.8810600089  |
| H | 0.5374575413  | 4.4237955678  | 1.2028428811  |
| C | -3.2999321947 | 0.2372646739  | 0.7440608661  |
| H | -4.3431801420 | 0.2612809667  | 1.0475661587  |
| C | -0.4605351007 | -2.9522618014 | -1.6100306528 |
| H | -0.6168654118 | -3.9247979859 | -2.0710125709 |
| C | 3.1024078714  | -2.3701994418 | -1.8585096588 |
| C | 2.0125438021  | -3.1605511683 | -2.1142243074 |
| C | -2.9007692928 | -2.9380462672 | -0.9355852171 |
| C | -3.6870954796 | -2.0618285916 | -0.2363371847 |
| C | -3.0544915445 | 2.6233878369  | 1.5486031838  |
| C | -2.0185904457 | 3.5192258884  | 1.5568919325  |
| C | 2.9093228495  | 3.2841119373  | 0.4363274723  |
| C | 3.7542976706  | 2.2940395223  | 0.0015428545  |
| H | -3.1726197160 | -3.9012643356 | -1.3524959402 |
| H | -4.7349781186 | -2.1552892212 | 0.0231242096  |
| H | -4.0749855165 | 2.7701374944  | 1.8828947803  |
| H | -2.0199436706 | 4.5461485426  | 1.9044629084  |
| H | 3.1598379929  | 4.2927088014  | 0.7457015426  |
| H | 4.8311210071  | 2.3346678338  | -0.1195838197 |
| H | 4.1440004735  | -2.5660530160 | -2.0869857310 |
| H | 1.9854624681  | -4.1337838534 | -2.5910791775 |
| N | -0.3190317591 | 0.8614644108  | -1.8961891979 |
| H | 0.5104612820  | 1.0318401798  | -2.5032718693 |
| O | -1.3791582065 | 1.1977230280  | -2.4723524963 |
| N | 0.4220108278  | -0.6684516978 | 1.7221591430  |
| C | 0.3715544163  | -2.0040145554 | 2.1022663989  |
| C | 0.7883139318  | 0.0125073357  | 2.8004193432  |
| H | 0.9246003582  | 1.0817522650  | 2.8582570306  |
| C | 0.7128418820  | -2.1405151174 | 3.4336198289  |
| N | 0.9759741568  | -0.8356376496 | 3.8623510113  |

|    |               |               |               |
|----|---------------|---------------|---------------|
| H  | 0.0916369643  | -2.7740500337 | 1.3994503938  |
| C  | 0.8181049164  | -3.3400345839 | 4.3330327726  |
| H  | 1.8348666560  | -3.4705666001 | 4.7304142264  |
| H  | 0.1322926282  | -3.2754355387 | 5.1898462783  |
| H  | 0.5631811551  | -4.2452724958 | 3.7729257047  |
| H  | 1.2556696144  | -0.5593193653 | 4.7952806863  |
| Fe | -0.0135511435 | 0.1753885316  | -0.2598355116 |
| O  | 2.1162216813  | 1.6226846617  | -3.5622154768 |
| H  | 2.2763765338  | 2.4751550898  | -3.1147743270 |
| H  | 2.7249203190  | 1.0089950552  | -3.1054945326 |
| H  | -3.4350691845 | 0.9860290464  | -2.3543971713 |
| O  | -4.2939128839 | 0.6767398765  | -2.7041207635 |
| H  | -4.0367383445 | -0.1373504165 | -3.1734453444 |

**Table S18.** The SCF Energies of All Structures Optimized by using the mPWVWN method  
Described in the Text

| Compound | E (Hartrees) |
|----------|--------------|
| 1        | -131.34503   |
| 2        | -5841.03125  |
| 3        | -7126.74936  |
| 4        | -2779.67104  |
| 5        | -2779.67036  |
| 6        | -2659.99393  |
| 7        | -2659.77029  |
| 13       | -2660.63454  |
| 14       | -2737.61552  |
| 15       | -2737.61781  |
| 16       | -2814.53615  |
